# Supplementary material
Source: publisher figshare collection journal article supplement (https://springernature.figshare.com/ndownloader/files/14365334)
Supplement: Supplementary file 1 [file 14365334]

## Sheet: Table S1
Sample	Height (m)	Na2O (%)	MgO (%)	Al2O3 (%)	SiO2 (%)	P2O5 (%)	K2O (%)	CaO (%)	TiO2 (%)	MnO (%)	Fe2O3* (%)	Mg/Al	Ti/Al
NF-62	0.88	0.121	1.51567	16.5887	71.592	0.102	4.36133	0.0146667	0.798667	0.00522667	4.45667	0.0291451	0.0152559
NF-51K	0.6	0.093	1.32367	13.5963	78.3587	0.0746667	3.77833	0.0156667	0.698	0.00321667	1.53567	0.0310549	0.0162673
NF-51I	0.3	0.0883333	1.34433	13.7517	78.4927	0.065	3.82633	0.00966667	0.710333	0.00376667	1.696	0.0311835	0.0163678
NF-51G	0.12	0.109333	1.61967	15.8123	71.6957	0.079	4.34267	0.008	0.814	0.00745333	3.43	0.032674	0.0163121
NF-51D	0	0.117333	1.869	17.9487	63.7553	0.113	5.00067	0.0146667	0.962333	0.792477	6.11367	0.0332162	0.0169893
NF-51A	-0.1	0.102	1.49567	15.1507	68.561	0.129333	4.121	0.0163333	0.807667	1.86718	5.41933	0.0314902	0.0168921
NF-48B	-0.33	0.155	2.20967	21.1003	57.824	0.134667	5.83833	0.00766667	1.08033	0.10607	9.16867	0.0334049	0.0162237
NF-45B	-0.53	0.130333	1.929	18.8227	63.2517	0.121333	5.25267	0.00666667	0.973333	0.01597	6.71433	0.0326907	0.0163856
NF-41B	-0.76	0.138667	2.03367	20.617	59.9127	0.121333	5.653	0.015	1.049	0.07439	7.73933	0.031465	0.0161225
NF-37B	-0.9	0.134	1.84633	20.3173	58.1263	0.118	5.86067	0.0126667	1.09467	0.0100733	9.12367	0.0289879	0.0170725
NF-32B	-1.11	0.140667	1.805	21.2293	59.0583	0.0886667	6.11	0.0126667	1.153	0.0139767	6.16567	0.0271215	0.0172098
NF-29B	-1.25	0.102	1.471	15.5663	72.799	0.0923333	3.90533	0.016	0.754	0.0147033	3.81333	0.0301439	0.0153486
NF-25B	-1.42	0.079	1.191	14.366	71.5603	0.121333	3.817	0.014	0.728	0.011	6.43667	0.0264453	0.0160575
NF-24B	-1.5	0.134	1.696	20.7197	61.709	0.116333	5.75733	0.0206667	1.08367	0.0119267	5.56933	0.0261106	0.0165728
NF-23B	-1.56	0.106	1.37467	16.825	69.2713	0.113333	4.53567	0.019	0.87	0.01207	4.75567	0.0260625	0.016385
NF-21B	-1.63	0.0663333	0.844667	10.3143	83.6017	0.0666667	2.69533	0.017	0.508	0.0051	2.292	0.0261226	0.0156065
NF-17B	-1.82	0.0926667	1.37433	14.942	72.646	0.0906667	3.97933	0.008	0.746	0.01122	4.34367	0.0293397	0.0158202
NF-12B	-2.01	0.105333	1.74733	20.1543	62.7183	0.096	5.77933	0.01	1.05667	0.0215533	4.27867	0.0276554	0.0166132
NF-11B	-2.08	0.125	1.834	21.5863	59.529	0.092	6.13067	0.00933333	1.14867	0.01859	4.76067	0.0271015	0.0168616
*Total iron as Fe2O3
